# Supplementary material for: More than health: quality of life trajectories among older adults—findings from The Irish Longitudinal Study of Ageing (TILDA)
Source: Springer Nature journal article supplement (doi:10.1007/s11136-018-1997-y), 2018-09-12
Supplement: MOESM1 [file 16120408]

**Figure S1.** Flowchart of respondent completion of SCQs and CASP-12 in TILDA Waves 1, 2, and 3

Completed Wave 2 SCQ (n=6003); Completed CASP-12 (n=5517)

Completed Wave 3 SCQ (n=5353); Completed CASP-12 (n=4915)

Did not complete SCQ (n=1260)

CASP at Wave 1 only

(n=473)

CASP at Wave 1 & Wave 2 only (n=953)

CASP at Wave 1 & Wave 3 only (n=396)

CASP at all Waves

(n=3646)

Completed Wave 1 SCQ (n=6915); Completed CASP-12 (n=6075)

Wave 1 participants aged ≥ 50 years (n=8175)

**Table S1** Gender-specific latent growth curve models of Quality of Life (CASP-12) with increasing age

|  | **Men** | | **Women** | |
| --- | --- | --- | --- | --- |
|  | **Estimate** | **95% CI** | **Estimate** | **95% CI** |
| Growth parameters |  |  |  |  |
| Intercept | 28.36 | 27.96, 28.76 | 28.94 | 28.57, 29.32 |
| Intercept variance | 21.32 | 18.25, 24.40 | 18.58 | 16.13, 21.03 |
| Slope | -0.63 | -0.82, -0.45 | -0.74 | -0.90, -0.59 |
| Slope variance | 2.95 | 1.82, 4.08 | 1.35 | 0.37, 2.34 |
| Time-invariant |  |  |  |  |
| Intercept regressed on (Age-62) | 0.08 | 0.05, 0.11 | 0.03 | -0.01, 0.06 |
| Intercept regressed on (Age-62)2 | -0.01 | -0.01, 0.00 | -0.01 | -0.01, -0.01 |
| Slope regressed on (Age-62) | -0.04 | -0.05, -0.02 | -0.02 | -0.04, -0.01 |
| Slope regressed on (Age-62)2 | 0.00 | 0.00, 0.00 | 0.00 | 0.00, 0.00 |
| Model fit statistics |  |  |  |  |
| Chi-square (*df*) | 12.596 (3)** |  | 4.569 (3) |  |
| CFI | 0.99 |  | 1.00 |  |
| TLI | 0.95 |  | 1.00 |  |
| RMSEA | 0.04 | 0.02, 0.07 | 0.02 | 0.00, 0.04 |
| N | 1692 |  | 1954 |  |

**Table S2** Gender-specificlatent growth curve analysis of Quality of Life (CASP-12) over a four year period

| **Time-varying parameters** | | **Quality of Life at wave 1** | | **Quality of Life at wave 2** | | **Quality of Life at wave 3** | |
| --- | --- | --- | --- | --- | --- | --- | --- |
|  | | **Men** | **Women** | **Men** | **Women** | **Men** | **Women** |
|  | | **Estimate**  **(95% CI)** | **Estimate**  **(95% CI)** | **Estimate**  **(95% CI)** | **Estimate**  **(95% CI)** | **Estimate**  **(95% CI)** | **Estimate**  **(95% CI)** |
| Living with spouse/partner (no spouse) | | 1.23 (0.64,1.81) | 0.96 (0.48,1.44) | 0.54 (-0.03,1.11) | 0.55 (0.08,1.02) | 0.88 (0.23,1.53) | 0.23 (-0.34,0.80) |
| Self-rated health (fair or poor) | | -0.93 (-1.65,-0.21) | -1.08 (-1.82,-0.35) | -0.25 (-0.86,0.37) | -1.00 (-1.61,-0.40) | -0.96 (-1.78,-0.13) | -1.04 (-1.82,-0.26) |
| Limiting illness (limited) | | -0.24 (-0.75,0.28) | -0.44 (-0.98,0.11) | -0.51 (-1.04,0.01) | -0.68 (-1.17,-0.18) | -0.56 (-1.05,-0.06) | -0.49 (-1.01,0.03) |
| Chronic pain (chronic pain) | | -0.15 (-0.58,0.27) | -0.38 (-0.76,-0.01) | -0.57 (-1.02,-0.12) | -0.52 (-0.93,-0.10) | -0.34 (-0.80,0.13) | -0.69 (-1.11,-0.26) |
| Number of ADLs1 | | -0.40 (-1.20,0.41) | -0.35 (-1.19,0.48) | -0.61 (-1.65,0.42) | -0.35 (-1.28,0.58) | -0.11 (-1.20,0.98) | -0.02 (-1.19,1.15) |
| Number of IADLs2 | | -1.80 (-2.86,-0.74) | -0.15 (-1.05,0.76) | -0.42 (-1.45,0.62) | -0.41 (-1.27,0.46) | 0.04 (-1.14,1.22) | -0.94 (-1.75,-0.14) |
| Number of physical impairments | | -0.22 (-0.37,-0.07) | -0.36 (-0.47,-0.24) | -0.39 (-0.53,-0.26) | -0.32 (-0.43,-0.21) | -0.30 (-0.44,-0.17) | -0.28 (-0.39,-0.16) |
| Fear of falling (no fear) | | -0.01 (-0.16,0.14) | -0.01 (-0.11,0.09) | 0.11 (-0.01,0.22) | 0.12 (0.03,0.22) | 0.13 (-0.01,0.26) | 0.08 (-0.02,0.18) |
| Polypharmacy | | -0.73 (-1.23,-0.23) | -0.29 (-0.82,0.24) | -0.23 (-0.71,0.25) | 0.01 (-0.42,0.45) | -0.35 (-0.87,0.18) | -0.41 (-0.90,0.09) |
| Self-rated mental health (fair/poor) | | -1.30 (-2.21,-0.39) | -1.42 (-2.19,-0.64) | -1.31 (-2.36,-0.27) | -1.16 (-1.81,-0.51) | -0.20 (-1.17,0.77) | -0.93 (-1.75,-0.11) |
| Number of depressive symptoms | | -0.16 (-0.24,-0.08) | -0.16 (-0.23,-0.10) | -0.23 (-0.31,-0.15) | -0.19 (-0.26,-0.13) | -0.21 (-0.31,-0.12) | -0.14 (-0.21,-0.07) |
| UCLA loneliness score | | -1.04 (-1.17,-0.91) | -0.91 (-1.03,-0.80) | -0.91 (-1.03,-0.79) | -0.76 (-0.86,-0.67) | -0.96 (-1.10,-0.83) | -0.90 (-1.01,-0.78) |
| Social Network Index | | 0.27 (-0.01,0.56) | 0.37 (0.16,0.57) | 0.15 (-0.09,0.39) | 0.42 (0.19,0.64) | 0.31 (0.03,0.58) | 0.37 (0.10,0.63) |
| Social activities (at least monthly) | | 0.26 (-0.45,0.97) | 1.03 (0.38,1.67) | 1.33 (0.61,2.06) | 0.55 (-0.05,1.15) | 0.79 (0.10,1.49) | 0.95 (0.28,1.61) |
| Caring for grandchild(ren) (yes) | | 0.55 (0.15,0.95) | 0.32 (-0.02,0.65) | 0.38 (-0.01,0.78) | 0.08 (-0.30,0.46) | 0.28 (-0.13,0.70) | -0.09 (-0.52,0.34) |
| Caring for parent(s) (no) | | -0.12 (-0.64,0.41) | -0.35 (-0.81,0.11) | -0.36 (-1.03,0.32) | -0.11 (-0.77,0.54) | -0.26 (-0.97,0.44) | -0.81 (-1.64,0.02) |
| Household income quintiles | | 0.35 (0.22,0.49) | 0.20 (0.08,0.32) | 0.20 (0.07,0.33) | 0.09 (-0.03,0.21) | 0.42 (0.26,0.58) | 0.19 (0.05,0.34) |
| Spouse died between wave 1 and 3 | |  |  |  |  | 0.72 (-0.65,2.10) | 1.20 (0.28,2.12) |
|  |  | **Men** | | **Women** | |  |  |
|  |  | **Estimate** | **95% CI** | **Estimate** | **95% CI** |  |  |
| **Growth parameters** | Intercept | 28.61 | (27.27,29.96) | 29.01 | (27.80,30.22) |  |  |
| Intercept variance | | 7.82 | (6.20,9.45) | 6.03 | (4.60,7.47) |  |  |
| Slope | | -1.18 | (-2.08,-0.28) | -0.51 | (-1.34,0.33) |  |  |
| Slope variance | | 1.81 | (1.01,2.61) | 0.85 | (0.12,1.59) |  |  |
| **Time-invariant parameters** | |  |  |  |  |  |  |
| Intercept regressed on (Age-62) | | 0.05 | (0.03,0.08) | 0.03 | (0.00,0.05) |  |  |
| Intercept regressed on (Age-62)2 | | 0.00 | (-0.01,0.00) | -0.01 | (-0.01,0.00) |  |  |
| Intercept regressed on education | | 0.16 | (-0.11,0.44) | 0.19 | (-0.08,0.45) |  |  |
| Slope regressed on (Age-62) | | -0.02 | (-0.03,0.00) | -0.01 | (-0.02,0.01) |  |  |
| Slope regressed on (Age-62)2 | | 0.00 | (0.00,0.00) | 0.00 | (0.00,0.00) |  |  |
| Slope regressed on education | | -0.03 | (-0.20,0.14) | -0.07 | (-0.25,0.10) |  |  |
| **Model fit** | Chi-square (df) | 257.716 (108) | | 333.297 (108) | |  |  |
| CFI | | 0.95 | | 0.94 | |  |  |
| TLI | | 0.93 | | 0.90 | |  |  |
| RMSEA | | 0.03 | | 0.03 | |  |  |
| N | | 1692 | | 1954 | |  |  |

1. ADL: Activities of daily living; 2. IADL: Instrumental activities of daily living
